## **Defining endemism levels for biodiversity conservation: tree species in the Atlantic Forest hotspot**

Renato A. F. Lima<sup>1</sup>, Vinícius C. Souza<sup>2</sup>, Marinez F. Siqueira<sup>3</sup> & Hans ter Steege<sup>1,4</sup>

1 Biodiversity Dynamics group, Naturalis Biodiversity Center, Leiden, The Netherlands. Email: [renato.lima@naturalis.nl](mailto:renato.lima@naturalis.nl)

2 Departamento de Ciências Biológicas, Escola Superior de Agricultura ‘Luiz de Queiroz’ – Universidade de São Paulo, Piracicaba, Brazil. Email: [vcsoouza@usp.br](mailto:vcsoouza@usp.br)

3 Diretoria de Pesquisas Científicas, Jardim Botânico do Rio de Janeiro, Rio de Janeiro, Brazil. Email: [marinez@jbrj.gov.br](mailto:marinez@jbrj.gov.br)

4 Systems Ecology, Free University, De Boelelaan 1087, Amsterdam, 1081 HV, Netherlands. Email: [hans.tersteege@naturalis.nl](mailto:hans.tersteege@naturalis.nl)

*Running title:* Endemism levels for conservation

*Number of words in the abstract:* 150

*Number of words in the manuscript:* 2849

*Number of references:* 39

*Number of figures and tables:* 3

*Name and mailing address:* Renato A. F. Lima, Naturalis Biodiversity Center, Darwinweg 2, 2333 CR Leiden, The Netherlands. Telephone: +31 (0)71 751 9272. Email: [renato.lima@naturalis.nl](mailto:renato.lima@naturalis.nl)

## Abstract

2 Endemic species are essential for setting conservation priorities. Yet, quantifying  
endemism remains challenging because endemism concepts can be too strict (*i.e.* pure  
4 endemism) or too subjective (*i.e.* near endemism). We use a data-driven approach to  
objectively estimate the proportion of records outside a given the target area (*i.e.*  
6 endemism level) that optimizes the separation of near-endemics from non-endemic  
species. Based on millions of herbarium records for the Atlantic Forest tree flora, we  
8 report an updated checklist containing 5062 species and compare how species-specific  
endemism levels match species-specific endemism accepted by taxonomists. We show  
10 that an endemism level of 90% delimits well near endemism, which in the Atlantic  
Forest revealed an overall tree endemism ratio of 45%. The diversity of pure and near  
12 endemics and of endemics and overall species was congruent in space, reinforcing that  
pure and near endemic species can be combined to quantify endemism to set  
14 conservation priorities.

*Key-words:* biodiversity hotspot, endemism centres, endemism ratio, near endemism,  
16 occasional species, plant conservation, species richness

## 18 1 INTRODUCTION

In times of increasing threats to biodiversity and limited resources for its conservation,  
20 prioritizing actions is essential. One common practice in biodiversity conservation is to  
target areas with many flagship species, such as species threatened with extinction (*i.e.*  
22 threatened species) or those exclusive to a given region or habitat (*i.e.* endemic species).  
These flagship species are important for conservation because they have a greater  
24 extinction risk than other species (Brooks et al., 2006; Myers et al., 2000; Peterson &  
Watson, 1998). In addition, patterns of total and endemic species richness can be

26 congruent (Kier et al., 2009; Letters et al., 2002; Storch, Keil, & Jetz, 2012), so the  
protection of high-endemism areas could also safeguard the remaining biodiversity.  
28 However, there have been more efforts to delimit threatened species than endemic ones.  
Threatened species are grouped by clearly-defined categories enclosed by objective  
30 criteria (IUCN, 2018), while species often are classified simply as being endemic or not.

There are proposals to divide endemics species based on spatial scale (*e.g.*  
32 narrow, regional and continental endemics), evolutionary history (*e.g.* neo and paleo  
endemics) or habitat specificity (*e.g.* edaphic endemics; Ferreira & Boldrini, 2011;  
34 Kruckeberg & Rabinowitz, 1985; Peterson & Watson, 1998). These proposals, however,  
implicitly assume that all individuals of a species are confined to a given region or  
36 habitat, also known as true or pure endemism (Tyler, 1996). If one record is found  
outside the target region, the species is to be (re)classified as non-endemic. Since pure  
38 endemism is rather strict, the term near-endemism has been used to describe species  
with few records outside the target region (Carbutt & Edwards, 2006; Matthews, van  
40 Wyk, & Bredenkamp, 1993; Noroozi et al., 2018; Platts et al., 2011). Near-endemics are  
the result rare dispersal events, temporary establishment in different habitats or the  
42 existence small satellite populations (Matthews, van Wyk, & Bredenkamp, 1993;  
Perera, Ratnayake-Perera, & Procheş, 2011).

44 The differentiation between pure and near endemics is challenging, because it  
may not be stable in time: near endemics can become pure endemics if habitat loss is  
46 higher outside than inside the target region (Carbutt & Edwards, 2006). Conversely,  
pure endemics may become near endemics with the accumulation of knowledge on their  
48 geographical distribution (Werneck et al., 2011). This is particularly true for  
geographically-restricted species, which often have scarce occurrence data.  
50 Furthermore, pure endemics may be classified as near endemics due to species

misidentifications (Carbutt & Edwards, 2006) or by a questionable delimitation of the  
52 target region (Platts et al., 2011). In practice, conservation aims at protecting as many  
individuals as possible for a given species (IUCN, 2018). So, the differentiation  
54 between pure and near endemism may have little impact to plan conservation actions.  
Therefore, the practical question is: how to distinguish both groups of endemic species  
56 from non-endemic species? Defining pure endemism is straightforward, but separating  
near-endemics from non-endemic species can be quite subjective.

58 Here we establish objective limits to separate near-endemic from non-endemic  
species for conservation purposes. We also separate widespread species from occasional  
60 species, *i.e.*, species common in other regions but sporadic in the target region (Barlow  
et al., 2010). We use a data-driven approach to estimate what ratio of occurrences inside  
62 a target region could be used to separate species into pure-endemics, near-endemics,  
widespread and occasional species. We perform this evaluation for over 5000 tree  
64 species from the Atlantic Forest, a biodiversity hotspot with abundant knowledge on the  
taxonomy and distribution of its flora. Using millions of carefully curated occurrences  
66 from over 500 collections around the world, we evaluate which ratio of occurrences  
inside the Atlantic Forest match species-specific endemism accepted by taxonomic  
68 experts. Finally, we delimit centres of diversity for pure- endemics, near-endemics and  
occasional species and discuss the implications for the conservation of this biodiversity  
70 hotspot.

## 72 **2 METHODS**

### **2.1 Retrieval and validation of occurrence data**

74 The Atlantic Forest covers Argentina, Brazil and Paraguay, so we searched for  
occurrences using a list of tree names for South America (see Supporting Information

76 for more details), compiled from different sources (Grandtner & Chevrette, 2013; Lima  
et al., 2015; Oliveira-Filho, 2010; ter Steege et al., 2016; Zappi et al., 2015; Zuloaga,  
78 Morrone, & Belgrano, 2008). We carefully inspected the list of names to avoid the  
inclusion of exotic and non-arborescent species. Arborescent species, hereafter ‘trees’,  
80 were defined as species with free-standing stems that often exceed 5 cm of diameter at  
breast height (1.3 m) or 4 m in total height, including arborescent palms, cactus, tree  
82 ferns, and woody bamboos.

The list of South American tree names was used to download occurrence data  
84 from *speciesLink* ([www.splink.org.br](http://www.splink.org.br)), JABOT (<http://jabot.jbrj.gov.br>, Silva et al.,  
2017), ‘Portal de Datos de Biodiversidad Argentina’ (<https://datos.sndb.mincyt.gob.ar>)  
86 and the Global Biodiversity Information Facility (GBIF.org, 2019). We excluded all  
occurrences described as being cultivated or exotic. We checked names for typos,  
88 orthographical variants and synonyms in the Brazilian Flora 2020 (BF-2020) project  
(Filardi et al., 2018; Zappi et al., 2015). Decisions for unresolved names were made by  
90 consulting Tropicos ([www.tropicos.org](http://www.tropicos.org)) or the World Checklist of Selected Plant  
Families (<http://wcsp.science.kew.org>).

92 Using the 3.11 million records retrieved (Appendix S1), we conducted a detailed  
data cleaning and validation procedure (see Supporting Information for details). We  
94 standardized the notation of different fields (*e.g.* locality description, collector and  
identifier names, collection and identification dates), which were then used to (i) search  
96 for duplicate specimens among herbaria; (ii) validate the geographical coordinates at  
country, state and/or county levels and (iii) to assess the confidence level of the  
98 identification of each specimen (*i.e.* ‘validated’ and ‘probably validated’ - Appendix  
S2). Moreover, (iv) we cross-validated information of duplicate specimens across  
100 herbaria to obtain missing or more precise coordinates and/or valid identifications.

Finally, (iv) we removed specimens too distant from their core distributions (i.e. spatial  
102 outliers).

## 104 **2.2 Endemism levels**

We obtained the endemism classification of each species from the BF-2020 (Filardi et  
106 al., 2018), the best reference currently available for the Atlantic Forest flora. A species  
was classified as ‘endemic’ if the BF-2020 field ‘phytogeographic domain’ contained  
108 only the term ‘Atlantic Rainforest’. Correspondingly, a species was classified as  
‘occasional’ if this field did not include this term. Species with no information on the  
110 ‘phytogeographic domain’ were omitted from this analysis.

We calculated an empirical level of endemism based on the position of species  
112 records in respect to the Atlantic Forest limits (IBGE, 2012; Olson & Dinerstein, 2002).  
Each record was assigned as being inside, outside or in the transition of the Atlantic  
114 Forest to other domains. Records in the transition were those falling inside the Atlantic  
Forest limits, but in counties with less than 90% of its area inside the Atlantic Forest or  
116 vice-versa. Because of the variable precision of the specimen’s coordinates and of the  
arbitrariness of the domain delimitation at the scale of our reference map (1:5,000,000),  
118 records in the transition received half the weight other records to calculated species  
endemism levels:

$$120 \quad 100 \times (O_{in} + O_{ti}/2) / (O_{in} + O_{ti}/2 + O_{out} + O_{to}/2),$$

where,  $O_{in}$ ,  $O_{ti}$ ,  $O_{out}$  and  $O_{to}$  are the number of specimens inside, inside in the transition,  
122 outside and outside in the transition to the Atlantic Forest, respectively. This endemism  
level is actually a weighted proportion of occurrences inside the Atlantic Forest by the  
124 total of valid occurrences found, varying from 0 (no occurrences) to 100% (all  
occurrences inside the Atlantic Forest).

126           The comparison between the reference BF-2020 classification and the empirical  
classification of species endemism was based on thresholds values varying from 0 to  
128 100%, in intervals of 1% (*i.e.* 0, 1, ..., 99, 100%). If a given species had an observed  
endemism level equal or higher than the threshold, it was classified as ‘endemic’. For  
130 each threshold value, we calculated the number of mismatches between the two  
classifications (*i.e.* species classified as ‘endemic’ in the BF-2020 and ‘not endemic’  
132 from the observed endemism level or vice-versa). The same procedure was used to  
calculate the number of mismatches for occasional species. We then plotted the number  
134 of mismatches against all thresholds and estimated the optimum threshold that  
minimizes the number of mismatches between classifications. Optimum thresholds were  
136 estimated using piecewise regression, allowing up to five segments (*i.e.* four breaking  
points). Thus, we provided the breaking point of each curve (and its 95% confidence  
138 interval). We compared the results using only taxonomically ‘validated’ and using both  
taxonomically ‘validated’ and ‘probably validated’ records.

140

### **2.3 Centres of diversity**

142 We used the optimum threshold values obtained above to classify species into pure  
endemics, near endemics and occasional species and to delimit their centres of diversity  
144 (Laffan & Crisp, 2003). We plotted the valid occurrences of each group of species  
against a 50×50 km grid covering the Atlantic Forest and surrounding domains. Next,  
146 we obtained different diversity metrics for each group of species per grid cell. We  
selected two metrics with best performance to describe our data (Figures S1 and S2):  
148 corrected weighted endemism (WE) and rarefied/extrapolated richness ( $S_{RE}$ ). The WE is  
the species richness weighted by the inverse of the number of cells where the species is  
150 present, divided by cell richness (Crisp et al., 2001). The  $S_{RE}$  is the rarefied/extrapolated

richness (depending on the observed number of occurrences per cell) for a common  
152 number of 100 occurrences, calculated based on the species frequencies per cell (Chao  
et al., 2014). We also obtained the sample coverage estimate (Chao & Jost, 2012), used  
154 here as a proxy of sample completeness. We evaluated the relationship of the diversity  
of endemic and occasional species with overall species diversity using spatial regression  
156 models (*i.e.* linear regression with spatially correlated errors - Pinheiro & Bates, 2000).  
Centres of diversity were delimited using ordinary kriging and only the grid cells  
158 meeting some minimum criteria of sampling coverage (see Supporting Information).  
We used the 80% quantile of predicted diversity distributions to delimit the centres of  
160 endemism.

## 162 **3 RESULTS**

### **3.1 Number of species found for the Atlantic Forest**

164 After the removal of duplicates, spatial outliers and the geographical and taxonomic  
validation, we retained 593,920 valid records (disregarding records with ‘probably  
166 validated’ taxonomy). We found 252,911 valid records being collected inside the  
Atlantic Forest limits, which contained a total of 5062 arborescent species (4057 species  
168 excluding tall shrubs; Appendix S3). Most species-rich families were Myrtaceae (681),  
Fabaceae (658 species), Rubiaceae (328), Melastomataceae (290) and Lauraceae (222).  
170 If we consider the valid occurrences in the transitions of the Atlantic Forest to other  
domains, we could add 294 species as probably occurring in the Atlantic Forest  
172 (Appendix S4). Another 3148 names were retrieved but were finally excluded from the  
list for different reasons (*e.g.* synonyms, typos, orthographical variants, etc; Appendix  
174 S5).



### 176 **3.2 Endemism levels**

We found evidence of pure endemism (i.e. endemism level= 100%) for 1548 tree  
178 species (31%; Appendix S6). We found that 90.2% of records inside the Atlantic Forest  
(95% Confidence Interval, CI: 89.3–91.2%) was the threshold that best matched the  
180 endemism accepted by taxonomy experts (Figure 1a). The curve of mismatches between  
observed and reference classifications decreases until it reaches a minimum and then it  
182 increases again, meaning that more or less restrictive thresholds increase the number of  
mismatches. The 90.2% threshold in the Atlantic Forest added 733 near endemic  
184 species (15%). Together, pure and near endemics lead to an overall endemism ratio of  
45.1% for the Atlantic Forest arborescent flora (Figure 1b) and 1.01 endemic  
186 arborescent species per 100 km<sup>2</sup> of remaining forest (i.e. 2261.2 km<sup>2</sup>; Fundación Vida  
Silvestre Argentina & WWF, 2017). Some families had high average endemism level,  
188 namely Monimiaceae (94%), Symplocaceae (85%), Poaceae: Bambusoideae (84.2%),  
Araliaceae (84%), Myrtaceae (80%), Cyatheaceae (80%), Proteaceae (79%),  
190 Aquifoliaceae (77%) and Lauraceae (76%). Conversely, we found that 8.7% (95% CI:  
8.2–9.3%) was the best threshold for separating occasional from more common Atlantic  
192 Forest species (Figure 1a), leading to a total of 646 occasional species (13%). The  
remaining 42% of the species were classified as widespread (Appendix S6). Results  
194 using only occurrences with taxonomy flagged as ‘validated’ were similar (pure  
endemism: 32%; near endemism: 15%; occasional species: 14%, widespread species:  
196 39% - Figure S3, Appendix S6).

### 198 **3.3 Centres of diversity**

The diversity of endemic species was strongly correlated with the overall species  
200 diversity in the Atlantic Forest (Figure 2). There was also a strong and positive

correlation between the number of pure and near endemic species (Figure S4), meaning  
202 that the centres of diversity of pure and near endemics are highly congruent in space.  
The combination of pure and near endemics resulted in the same pattern of high  
204 diversity in the rainforests along the coast (Figure 3), corresponding to the Serra do Mar  
and Bahia Coastal Forests ecoregions (Olson & Dinerstein, 2002). Occasional species in  
206 the Atlantic Forest were really rare in the colder Araucaria region. Most of the  
distribution of occasional species was concentrated in the Brazilian Cerrado, but also in  
208 the Amazon and slightly less in the Caatinga domain. General patterns were fairly  
similar when using other diversity measures (Figures S5-S7).

210

#### **4 DISCUSSION**

212 Near endemism has been used to assess endemism levels of regional floras and faunas.  
However, such assessments often use loose (Carbutt & Edwards, 2006; Platts et al.,  
214 2011) or arbitrary definitions (Noroozi et al., 2018; Perera et al., 2011) of near  
endemics. Here, we used a data-driven approach to find that 90% of the occurrences  
216 inside a target region can be used to tell apart endemics from non-endemic trees. This is  
the same limit used to detect plant endemism in the Mediterranean Basin hotspot  
218 (Médail & Baumel, 2018), suggesting that a 90% limit could be used in assessment of  
plant endemism of other species-rich regions. This limit has another important  
220 implication: the average endemism concept adopted by taxonomic experts for Atlantic  
Forest trees implicitly includes the concept of near endemism. Indeed, the overall  
222 endemism ratio found here for pure and near endemics combined (45%) is within the  
range of 40-50% endemism level previously reported for the Atlantic Forest flora  
224 (Myers et al., 2000; Stehmann et al., 2009; Zappi et al., 2015). Thus, we propose that  
pure and near endemics can be used together to objectively delimit endemism or as two

226 categories of endemism, similarly to what already exists for the categories of species  
threat (IUCN, 2018).

228           The Atlantic Forest is arguably the tropical forest with the largest botanical  
knowledge available, with ca. 680 thousand unique specimens of tree species or 42 per  
230 100 km<sup>2</sup> – average collection density in the Amazon forest is below 10 per 100 km<sup>2</sup> (ter  
Steege et al., 2016). Nevertheless, here we added 714 new valid occurrences of tree  
232 species for this biodiversity hotspot, an increase of 21% to the 3343 trees previously  
reported by the Brazilian Flora (Zappi et al., 2015). As expected, about 47% of these  
234 new records corresponded to occasional species. These species corresponded to 13% of  
the total richness of the Atlantic Forest tree flora, confirming that occasional species,  
236 despite of their rarity, make an important contribution to overall biodiversity patterns  
(Barlow et al., 2010; ter Steege et al., 2019). More importantly, 53% of the new records  
238 corresponded to widespread and endemic species. An increase of 16% in the total  
richness was also observed for the Espírito Santo state flora compared to the reported in  
240 the Brazilian Flora (Dutra, Alves-Araújo, & Carrijo, 2015). These results highlight how  
data-driven approaches combined with careful validation steps can help to refine the  
242 knowledge of local and regional floras. The Brazilian Flora is permanently being  
improved and it already is of utmost importance for the understanding of the Brazilian  
244 flora (Zappi et al., 2015), the richest in the world (Ulloa et al., 2017). Here, we provide  
products that can be readily integrated into the Brazilian Flora project (*e.g.* more refined  
246 endemism filters) and a workflow to perform similar assessments in other regions or for  
other groups of organisms.

248           The delimitation of centres of endemic diversity provided here (Figure 3,  
Appendix S7) has direct implications for conservation planning. For instance, they can  
250 assist the identification of Important Plant Areas (IPA - [www.plantlifeipa.org](http://www.plantlifeipa.org)), provided

by the Target 5 of the Global Strategy for Plant Conservation ([www.cbd.int/gspc](http://www.cbd.int/gspc)).

252 Although the delimitation of IPAs predicts the use of endemic species, their definition is  
mainly based on the presence of threatened species. Moreover, since many of the  
254 endemic species identified here are probably also threatened, the Brazilian Alliance for  
Extinction Zero ([www.biodiversitas.org.br/baze](http://www.biodiversitas.org.br/baze)) could incorporate the concept of  
256 endemism proposed here to select plant trigger-species and to design conservation.  
Considering that defining threatened and endemic species have the same constraints  
258 related to data availability and to the time and spatial scale considered (Ferreira &  
Boldrini, 2011), the detection of endemics is more straightforward than threatened  
260 species, which could speed up the decision-making process for conservation. Therefore,  
the objective detection of endemic species proposed here (Appendix S6) could help to  
262 bridge the scarcity of conservation policies based on endemic species.

## 264 **ACKNOWLEDGMENTS AND DATA**

We thank Sidnei Souza and Renato Giovanni for their help with data compilation from  
266 *speciesLink* network. We also thank Lucie Zinger for helping with GBIF data  
management and for her suggestions on this manuscript. This study was supported by  
268 the European Union's Horizon 2020 research and innovation program under the Marie  
Skłodowska-Curie grant agreement No 795114. All data providers and their citations  
270 are given in Appendix S1.

## 272 **REFERENCES**

Barlow, J., Gardner, T. A., Louzada, J., & Peres, C. A. (2010). Measuring the  
274 conservation value of tropical primary forests: The effect of occasional species on  
estimates of biodiversity uniqueness. *PLoS ONE*, 5(3).

- 276 <https://doi.org/10.1371/journal.pone.0009609>
- Brooks, T. M., Mittermeier, R. A., Da Fonseca, G. A. B., Gerlach, J., Hoffmann, M.,
- 278 Lamoreux, J. F., ... Rodrigues, A. S. L. (2006). Global biodiversity conservation priorities. *Science*, 313(5783), 58–61. <https://doi.org/10.1126/science.1127609>
- 280 Carbutt, C., & Edwards, T. J. (2006). The endemic and near-endemic angiosperms of the Drakensberg Alpine Centre. *South African Journal of Botany*, 72(1), 105–132.
- 282 <https://doi.org/10.1016/j.sajb.2005.06.001>
- Chao, A., Gotelli, N. J., Hsieh, T. C., Sander, E. L., Ma, K. H., Colwell, R. K., &
- 284 Ellison, A. M. (2014). Rarefaction and extrapolation with Hill numbers: A framework for sampling and estimation in species diversity studies. *Ecological Monographs*, 84(1), 45–67. <https://doi.org/10.1890/13-0133.1>
- 286 Chao, A., & Jost, L. (2012). Coverage-based rarefaction and extrapolation : standardizing samples by completeness rather than size Author ( s ): Anne Chao and Lou Jost Published by : Wiley Stable URL :
- 288 <http://www.jstor.org/stable/41739612> REFERENCES Linked references are available on. *Ecology*, 93(12), 2533–2547. <https://doi.org/10.2307/41739612>
- 292 Crisp, Laffan, Linder, & Monro. (2001). Endemism in the Australian flora. *Journal of Biogeography*, 28(2), 183–198. <https://doi.org/10.1046/j.1365-2699.2001.00524.x>
- 294 Dutra, V. F., Alves-Araújo, A., & Carrijo, T. T. (2015). Angiosperm Checklist of Espírito Santo: Using electronic tools to improve the knowledge of an Atlantic Forest biodiversity hotspot. *Rodriguesia*, 66(4), 1145–1152.
- 296 <https://doi.org/10.1590/2175-7860201566414>
- 298 Ferreira, P. M. A., & Boldrini, I. I. (2011). Potential Reflection of Distinct Ecological Units in Plant Endemism Categories. *Conservation Biology*, 25(4), 672–679.
- 300 <https://doi.org/10.1111/j.1523-1739.2011.01675.x>

- Filardi, F. L. R., Barros, F., Baumgratz, J. F. A., Bicudo, C. E. M., Cavalcanti, T. B.,  
302 Nadruz Coelho, M. A., ... Zuntini, A. R. (2018). Brazilian Flora 2020: Innovation  
and collaboration to meet Target 1 of the Global Strategy for Plant Conservation  
304 (GSPC). *Rodriguésia*, 69(4), 1513–1527. <https://doi.org/10.1590/2175-7860201869402>
- 306 Fundación Vida Silvestre Argentina, & WWF. (2017). *State of the Atlantic Forest: Three countries, 148 million people, one of the richest forests on Earth*. Puerto  
308 Iguazú, Argentina
- GBIF.org (11 December 2019) GBIF Occurrence Download.  
310 <https://doi.org/10.15468/dl.mzmat2>
- Grandtner, M. M., & Chevrette, J. (2013). *Dictionary of Trees, Volume 2: South  
312 America: Nomenclature, Taxonomy and Ecology*. Amsterdam: Academic Press.
- IBGE. (2012). Mapa da Área de Aplicação da Lei no 11.428 de 2006. Retrieved from  
314 [http://geoftp.ibge.gov.br/informacoes\\_ambientais/estudos\\_ambientais/biomas/mapas/lei11428\\_mata\\_atlantica.pdf](http://geoftp.ibge.gov.br/informacoes_ambientais/estudos_ambientais/biomas/mapas/lei11428_mata_atlantica.pdf)
- 316 IUCN. (2018). The IUCN Red List of Threatened Species. Retrieved from  
<http://www.iucnredlist.org>
- 318 Kier, G., Kreft, H., Lee, T. M., Jetz, W., Ibisch, P. L., Nowicki, C., ... Barthlott, W.  
(2009). A global assessment of endemism and species richness across island and  
320 mainland regions. *Proceedings of the National Academy of Sciences*, 106(23),  
9322–9327. <https://doi.org/10.1073/pnas.0810306106>
- 322 Kruckeberg, A. R., & Rabinowitz, D. (1985). Biological aspects of endemism in higher  
plants. *Annual Review of Ecology and Systematics*, 16, 447–479.
- 324 Laffan, S. W., & Crisp, M. D. (2003). Assessing endemism at multiple spatial scales,  
with an example from the Australian vascular flora. *Journal of Biogeography*,

- 326 30(4), 511–520. <https://doi.org/10.1046/j.1365-2699.2003.00875.x>
- Letters, E., Bonn, A., Rodrigues, A. S. L., & Gaston, K. J. (2002). Threatened and  
328 endemic species: Are they good indicators of patterns of biodiversity on a national  
scale? *Ecology Letters*, 5(6), 733–741. <https://doi.org/10.1046/j.1461->  
330 0248.2002.00376.x
- Lima, R. A. F., Mori, D. P., Pitta, G., Melito, M. O., Bello, C., Magnago, L. F., ...  
332 Prado, P. I. (2015). How much do we know about the endangered Atlantic Forest?  
Reviewing nearly 70 years of information on tree community surveys. *Biodiversity*  
334 *and Conservation*, 24(9), 2135–2148. <https://doi.org/10.1007/s10531-015-0953-1>
- Matthews, W. S., van Wyk, A. E., & Bredenkamp, G. J. (1993). Endemic flora of the  
336 north-eastern Transvaal Escarpment, South Africa. *Biological Conservation*, 63(1),  
83–94. [https://doi.org/10.1016/0006-3207\(93\)90077-E](https://doi.org/10.1016/0006-3207(93)90077-E)
- 338 Médail, F., & Baumel, A. (2018). Using phylogeography to define conservation  
priorities: The case of narrow endemic plants in the Mediterranean Basin hotspot.  
340 *Biological Conservation*, 224, 258–266.  
<https://doi.org/10.1016/j.biocon.2018.05.028>
- 342 Myers, N., Mittermeier, R. A., Mittermeier, C. G., Fonseca, G. A. B., & Kent, J. (2000).  
Biodiversity hotspots for conservation priorities. *Nature*, 403, 858–863.
- 344 Noroozi, J., Talebi, A., Doostmohammadi, M., Rumpf, S. B., Linder, H. P., &  
Schneeweiss, G. M. (2018). Hotspots within a global biodiversity hotspot-areas of  
346 endemism are associated with high mountain ranges. *Scientific Reports*, 8(1), 1–10.  
<https://doi.org/10.1038/s41598-018-28504-9>
- 348 Oliveira-Filho, A. T. (2010). TreeAtlas 2.0, Flora arbórea da América do Sul cisandina  
tropical e subtropical: Um banco de dados envolvendo biogeografia, diversidade e  
350 conservação. Universidade Federal de Minas Gerais. Retrieved from [www](http://www.ufmg.br).

cb.ufmg.br/treeatlan

- 352 Olson, D. M., & Dinerstein, E. (2002). The Global 200: Priority ecoregions for global  
conservation. *Annals of the Missouri Botanical Garden*, 89(2), 199–224.
- 354 Perera, S. J., Ratnayake-Perera, D., & Procheş, Ş. (2011). Vertebrate distributions  
indicate a greater Maputaland-Pondoland-Albany region of endemism. *South*  
356 *African Journal of Science*, 107(7/8), 68–71.  
<https://doi.org/10.4102/sajs.v107i7/8.462>
- 358 Peterson, A. T., & Watson, D. M. (1998). Problems with areal definitions of endemism:  
the effects of spatial scaling. *Diversity and Distributions*, 4(4), 189–194.  
360 <https://doi.org/10.1046/j.1472-4642.1998.00021.x>
- Pinheiro, J., & Bates, D. (2000). Linear mixed-effects models: basic concepts and  
362 examples. *Mixed-Effects Models in S and S-Plus*. Retrieved from  
[https://link.springer.com/content/pdf/10.1007/0-387-22747-4\\_1.pdf](https://link.springer.com/content/pdf/10.1007/0-387-22747-4_1.pdf)
- 364 Platts, P. J., Burgess, N. D., Gereau, R. E., Lovett, J. C., Marshall, A. R., McClean, C.  
J., ... Marchant, R. (2011). Delimiting tropical mountain ecoregions for  
366 conservation. *Environmental Conservation*, 38(3), 312–324.  
<https://doi.org/10.1017/S0376892911000191>
- 368 Silva, L. A. E., Fraga, C. N., Almeida, T. M. H., Gonzalez, M., Lima, R. O., Rocha, M.  
S., ... Forzza, R. C. (2017). Jabot - Sistema de Gerenciamento de Coleções  
370 Botânicas: a experiência de uma década de desenvolvimento e avanços.  
*Rodriguésia*, 68(2), 391–410. <https://doi.org/10.1590/2175-7860201768208>
- 372 Stehmann, J. R., Forzza, R. C., Salino, A., Sobral, M., Pinheiro, D., & Kamino, H. Y.  
(2009). *Plantas da Floresta Atlântica*. Rio de Janeiro: Jardim Botânico do Rio de  
374 Janeiro.
- Storch, D., Keil, P., & Jetz, W. (2012). Universal species–area and endemics–area



- 376 relationships at continental scales. *Nature*, 488(7409), 78–81.  
<https://doi.org/10.1038/nature11226>
- 378 ter Steege, H., Vaessen, R. W., Cárdenas-López, D., Sabatier, D., Antonelli, A.,  
Oliveira, S. M., ... Salomão, R. P. (2016). The discovery of the Amazonian tree  
380 flora with an updated checklist of all known tree taxa. *Scientific Reports*, 6(1),  
29549. <https://doi.org/10.1038/srep29549>
- 382 ter Steege, H., Mota de Oliveira, S., Pitman, N. C. A., Sabatier, D., Antonelli, A.,  
Guevara Andino, J. E., ... Salomão, R. P. (2019). Towards a dynamic list of  
384 Amazonian tree species. *Scientific Reports*, 9(1), 1–5.  
<https://doi.org/10.1038/s41598-019-40101-y>
- 386 Tyler, P. A. (1996). Endemism in freshwater algae. In *Biogeography of Freshwater*  
*Algae* (pp. 127–135). Dordrecht: Springer Netherlands.  
388 [https://doi.org/10.1007/978-94-017-0908-8\\_12](https://doi.org/10.1007/978-94-017-0908-8_12)
- Ulloa, C. U., Acevedo-Rodríguez, P., Beck, S., Belgrano, M. J., Bernal, R., Berry, P. E.,  
390 ... Jørgensen, P. M. (2017). An integrated assessment of the vascular plant species  
of the Americas. *Science*, 358(6370), 1614–1617.  
392 <https://doi.org/10.1126/science.aao0398>
- Werneck, M. S., Sobral, M. E. G., Rocha, C. T. V., Landau, E. C., & Stehmann, J. R.  
394 (2011). Distribution and endemism of angiosperms in the atlantic forest. *Natureza*  
*a Conservacao*, 9(2), 188–193. <https://doi.org/10.4322/natcon.2011.024>
- 396 Zappi, D. C., Ranzato Filardi, F. L., Leitman, P., Souza, V. C., Walter, B. M. T., Pirani,  
J. R., ... Forzza, R. C. (2015). Growing knowledge: An overview of Seed Plant  
398 diversity in Brazil. *Rodriguésia*, 66(4), 1085–1113. <https://doi.org/10.1590/2175-7860201566411>
- 400 Zuloaga, F., Morrone, O., & Belgrano, M. (2008). *Catálogo de las plantas vasculares*

*del cono sur (Argentina, southern Brazil, Chile, Paraguay y Uruguay).*

402 Monographs in Systematic Botany from the Missouri Botanical Garden 107.

#### 404 **AUTHOR CONTRIBUTIONS SUPPORTING INFORMATION**

RAFL developed the idea of this study, conducted data compilation, analysis and  
406 drafted the paper. HTS assisted with herbarium data editing and study design. RAFL  
Geographical and taxonomical validation of the records were supported by MFS and  
408 VCS, respectively. All authors contributed to the interpretation and discussion of the  
results and writing the final manuscript.

410

#### **SUPPORTING INFORMATION**

412 **Supporting Methods and References**

##### **Supplementary Figures**

414

#### **LIST OF APPENDICES**

416 (Note: Full Appendices will be provided after the publication of the manuscript)

418 **Appendix S1:** List of collections and data providers used for data compilation.

The numbers of records retrieved per collection correspond to overall sum of records  
420 before data validation, thus including both valid and invalid records.

422 **Appendix S2:** List of names of taxonomists per family used for taxonomical validation.

The ‘tdwg.name’ represents the taxonomist name following the standard notation of the  
424 Biodiversity Information Standards (<https://www.tdwg.org>), which includes different  
variants of notation found for the same taxonomist name.

426

**Appendix S3:** Updated, taxonomically vetted checklist of the Atlantic Forest tree flora.

428 For each name included in the checklist we provide the life form, the status of the name  
in respect to the Brazilian Flora 2020 project, the number of records found inside the  
430 Atlantic Forest (both ‘validated’ and ‘probably validated’ taxonomy) and a list of up to  
30 vouchers (only specimens with ‘validated’ taxonomy), giving priority to type  
432 specimens. We also indicate which species were regarded as being taxa of low  
taxonomic complexity (TBC) or taxa commonly cultivated outside its original range.

434

**Appendix S4:** List of species with probable occurrence in the Atlantic Forest.

436 We present all names with valid records found only in the transition of the Atlantic  
Forest to other domains and those names cited in the Brazilian Flora 2020 project as  
438 being an Atlantic Forest species, but for which we did not find any valid records. Again,  
we present for each name the life form, the number of records found and a list of up to  
440 30 vouchers.

442 **Appendix S5:** List of names excluded from the final Atlantic Forest checklist.

For each name on the list we provide the life form and the reason why the name was  
444 excluded. For synonyms, orthographical variants, common typos we also provide the  
corresponding valid name used in this study.

446

**Appendix S6:** Endemism levels for the Atlantic Forest tree flora and the corresponding

448 classification into pure endemic, near endemic, widespread and occasional species.

For each species name, we provide the number of valid records outside the Atlantic

450 Forest, outside but in the transition to the Atlantic Forest, inside the Atlantic Forest but

in the transition to other domains, and inside the Atlantic Forest. We present the

452 endemism levels and species classifications using only records with validated taxonomy

and using records with validated and probably validated taxonomy. Finally, we present

454 the endemism classification currently accepted in the Brazilian Flora 2020 in respect to

the Atlantic Forest.

456

**Appendix S7:** Shapefiles delimiting the centres of the endemic and occasional species

458 diversity in the Atlantic Forest for pure endemics, near endemics, pure + near endemics

and occasional species.

460 Each shapefile contains the isoclines corresponding to the 75%, 80%, 85%, 90% and

95% quantiles of the distribution of rarefied/extrapolated richness for 100 specimens,

462 predicted using ordinary kriging.

464

## Figures

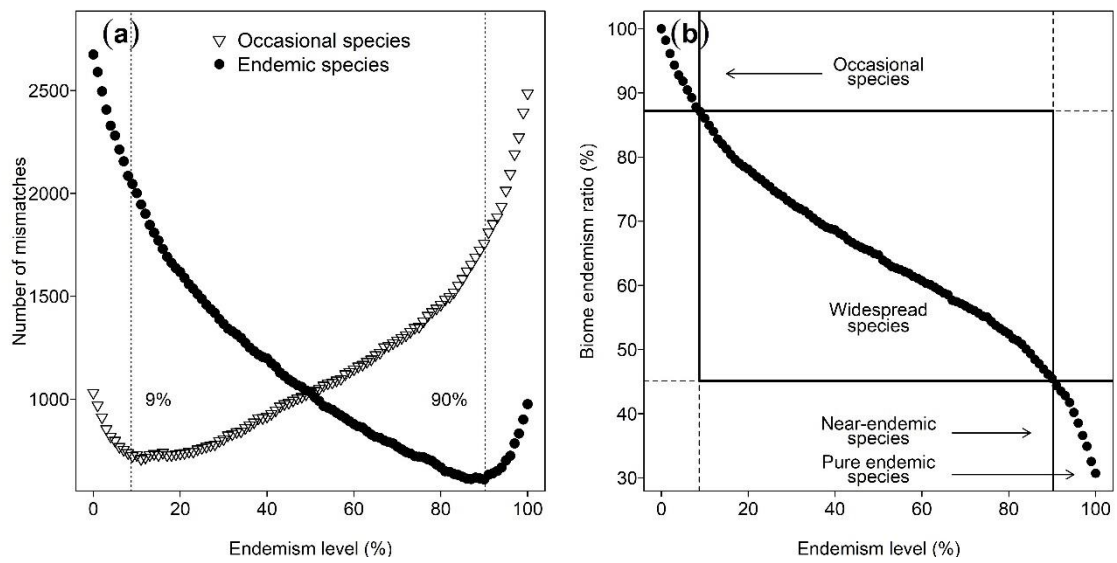

466

468

470

472

**Figure 1.** Defining near endemic and occasional tree species using herbarium records for the Atlantic Forest biodiversity hotspot. For both endemic (black circles) and occasional species (triangles), we present (a) the optimum endemism levels (vertical dashed lines) estimated from the distribution of mismatches between the empirical and the Brazilian Flora 2020 classifications and (b) the overall endemism ratio of the Atlantic Forest in intervals of 1% ( $x$ -axis in both panels).

474

476

478

480

482

484

486

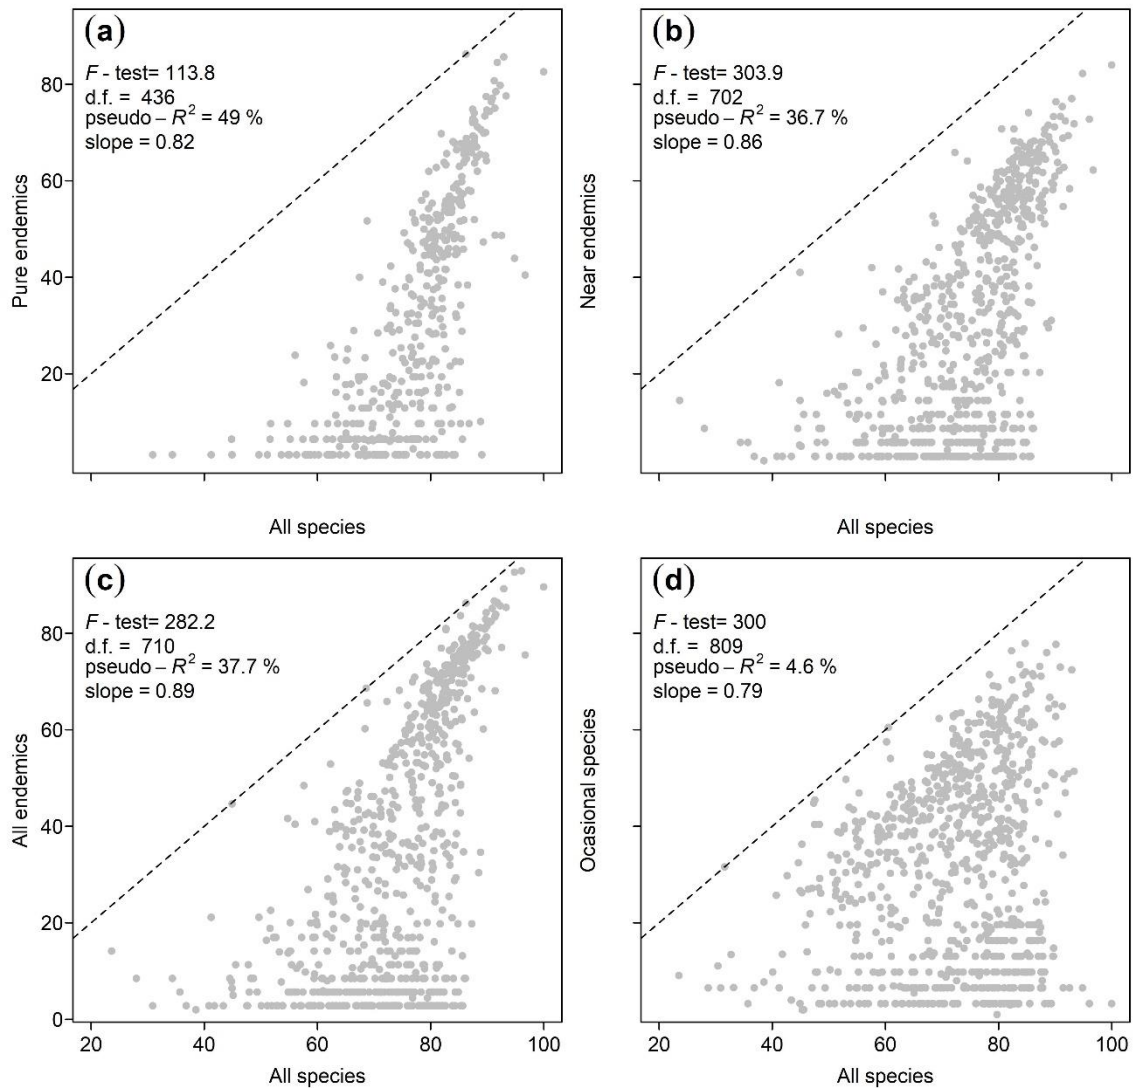

488

**Figure 2.** Relationship between the number of rarefied/extrapolated richness per 50×50 km grid cell and the same diversity metric obtained for (a) pure endemics, (b) near endemics, (c) all endemics (pure + near endemics) and (d) occasional species. For each group of species, we present the summary statistics of each spatial regression model (top left; d.f.= degrees of freedom), including the predicted slope of the regression prediction. The spatial regression analysis was performed only for grid cells meeting some minimum criteria of sampling coverage (see Supplementary Methods). The dashed line represents the 1:1 line.

498

500

502

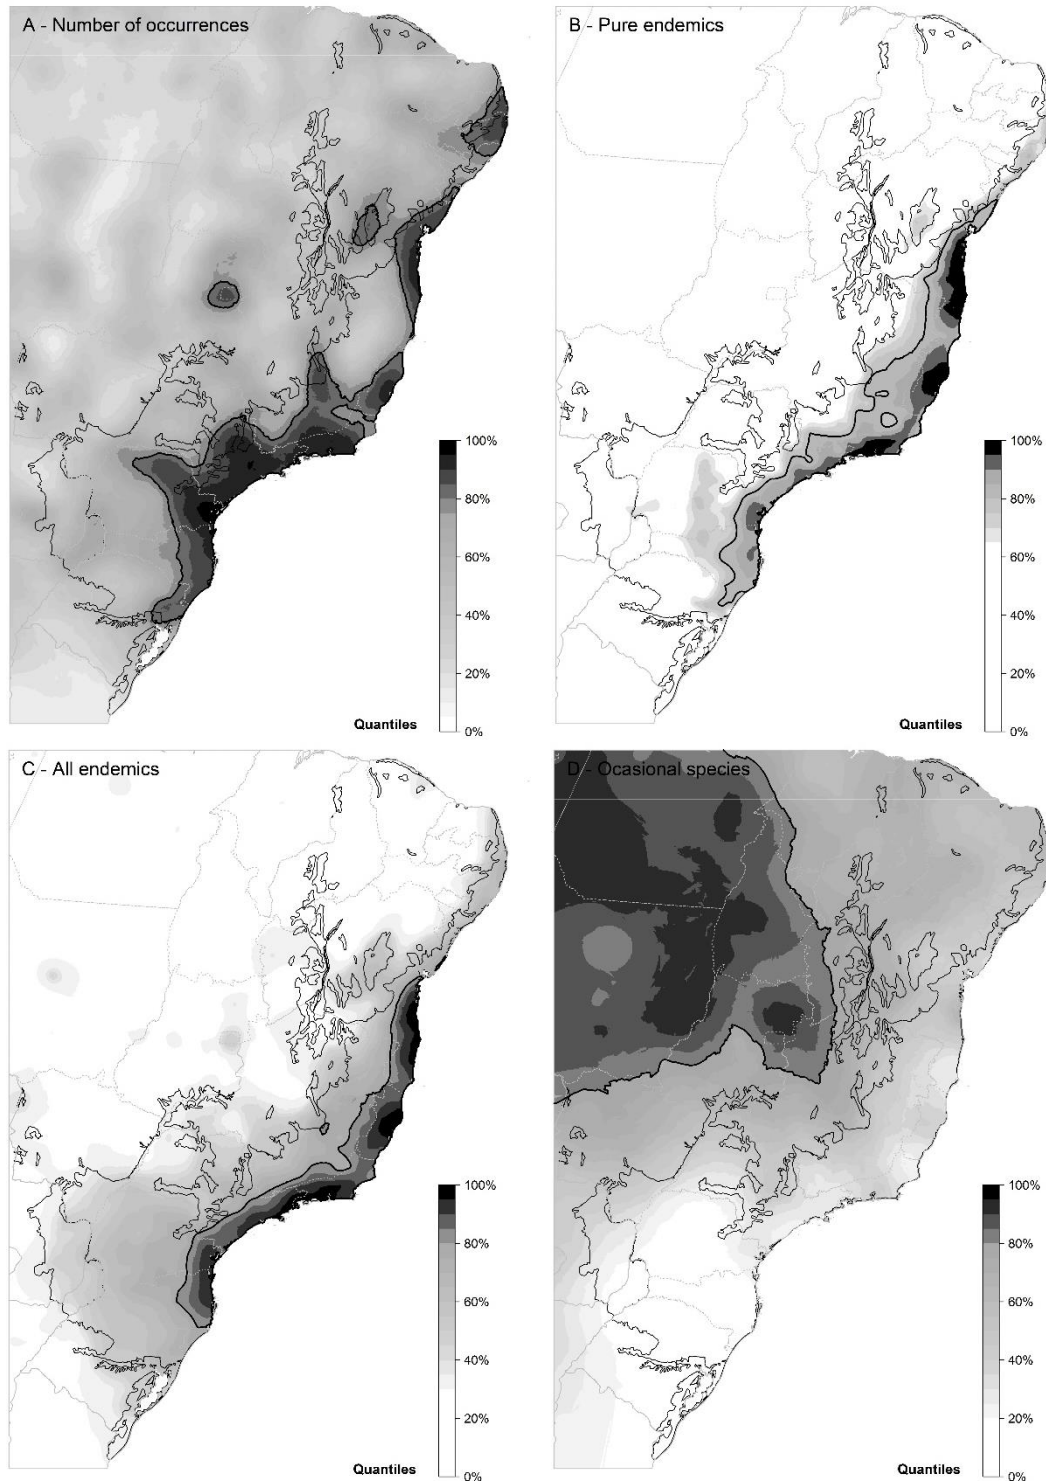

504 **Figure 3.** The spatial distribution of (A) the number of occurrences retrieved for the species occurring in the Atlantic Forest, and the centres of diversity of (B) pure  
506 endemics, (C) all endemics (pure + near) and (D) occasional species. Maps were  
508 produced using ordinary kriging based on rarefied/extrapolated species richness  
510 obtained for a common number of 100 records per grid cell. The colour scale represents  
512 the 5% quantiles of the metrics distribution, from 0-5% (white) to 95-100% (black).  
Bold black lines are the area containing the 80% higher richness values. The black line  
marks the limits of the Atlantic Forest, while the solid and dashed grey lines mark the  
limits of South American countries and of the Brazilian states, respectively.
